# Supplementary material for: Development of an artificial intelligence-derived histologic signature associated with adjuvant gemcitabine treatment outcomes in pancreatic cancer
Source: PubMed Central journal article supplement — Cell Rep Med. 2023 Apr 11;4(4):101013. doi: 10.1016/j.xcrm.2023.101013 (PMC10140610; doi:10.1016/j.xcrm.2023.101013), 2023-04-11
Supplement: mmc1.pdf [file mmc1.pdf]

**Cell Reports Medicine, Volume 4**

**Supplemental information**

**Development of an artificial intelligence-derived  
histologic signature associated with adjuvant  
gemcitabine treatment outcomes in pancreatic cancer**

**Vivek Nimgaonkar, Viswesh Krishna, Vrishab Krishna, Ekin Tiu, Anirudh Joshi, Damir Vrabac, Hriday Bhambhani, Katelyn Smith, Julia S. Johansen, Shalini Makawita, Benjamin Musher, Arnav Mehta, Andrew Hendifar, Zev Wainberg, Davendra Sohal, Christos Fountzilas, Aatur Singhi, Pranav Rajpurkar, and Eric A. Collisson**

## Supplementary Information

### Supplementary Figure 1

**A**

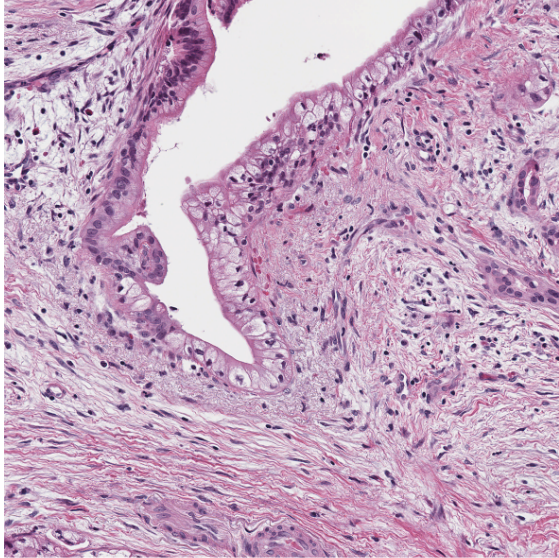

**B**

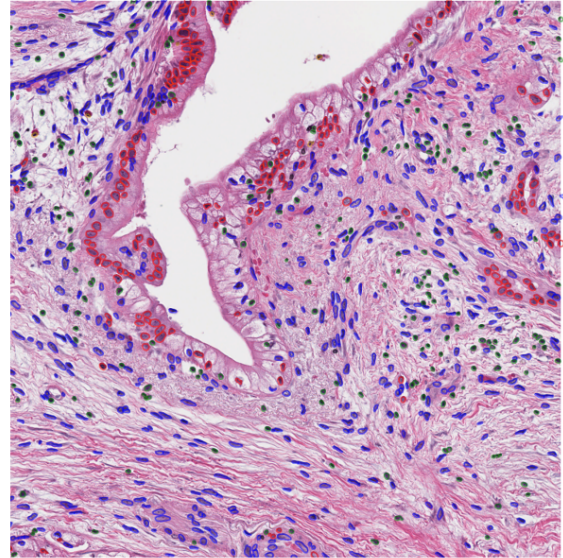

**Supplementary Figure 1: Example of nuclear segmentation in the TCGA Cohort. Related to Figure 2.** A) A digitally scanned image of a patient sample from the TCGA cohort without nuclear segmentation. B) The digitally scanned image of the patient sample from the TCGA cohort displayed in panel A with nuclear segmentation: red labels are neoplastic cells, blue labels are connective tissue cells, green labels are inflammatory cells, orange labels are non-neoplastic cells, and yellow labels are necrotic cells.

**Supplementary Figure 2**

**A**

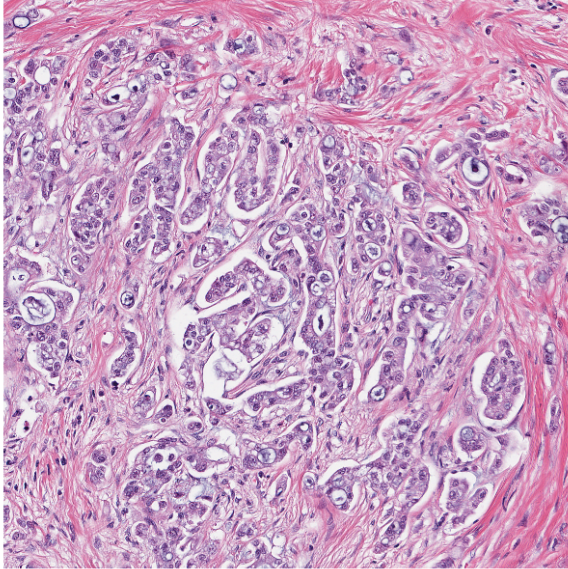

**B**

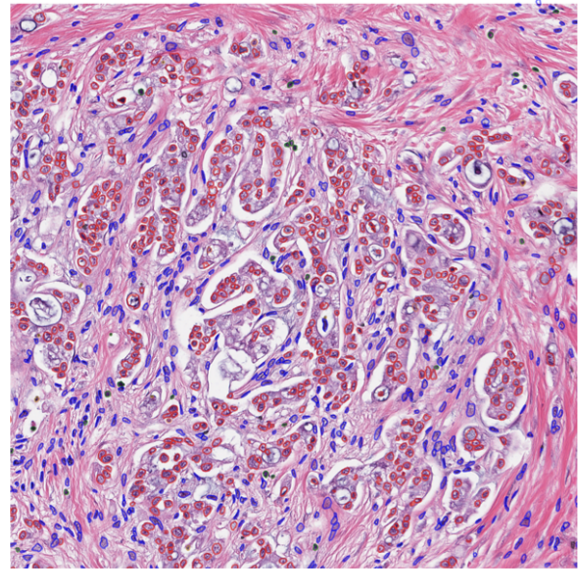

**Supplementary Figure 2: Example of nuclear segmentation in the Copenhagen Cohort. Related to Figure 2.**

A) A digitally scanned image of a patient sample from the Copenhagen cohort without nuclear segmentation. B) The digitally scanned image of the patient sample from the Copenhagen cohort displayed in panel A with nuclear segmentation: red labels are neoplastic cells, blue labels are connective tissue cells, green labels are inflammatory cells, orange labels are non-neoplastic cells, and yellow labels are necrotic cells.

### Supplementary Figure 3

**A**

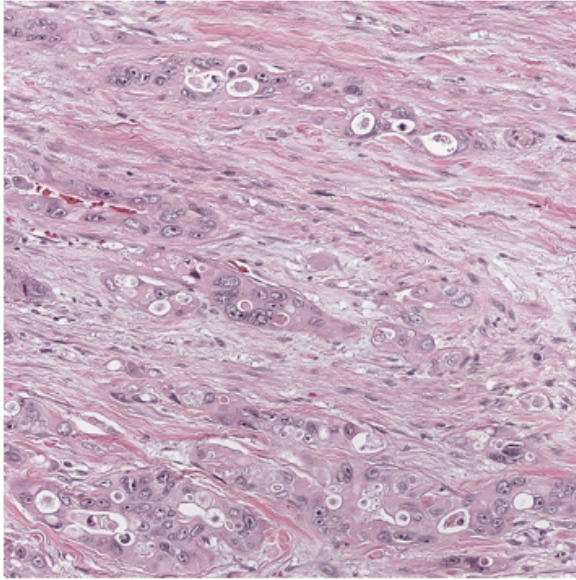

**B**

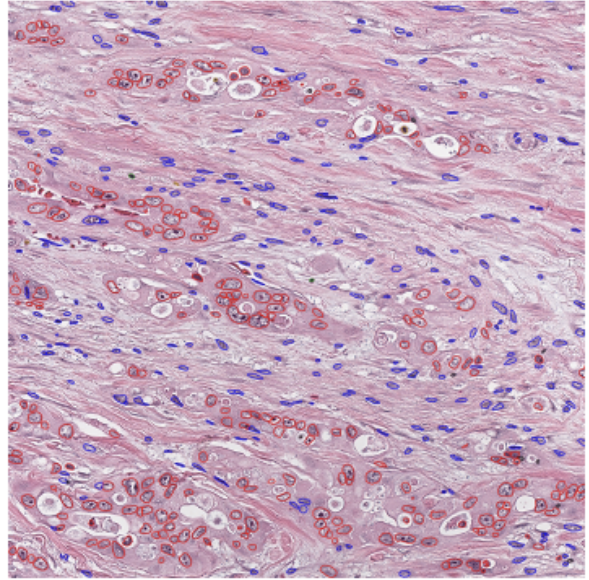

**C**

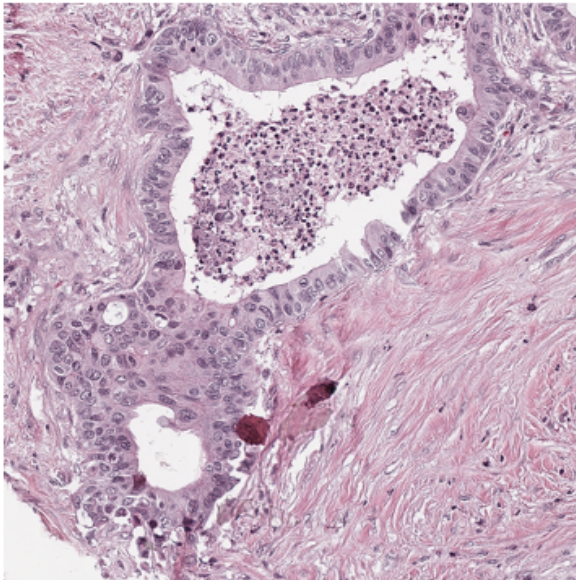

**D**

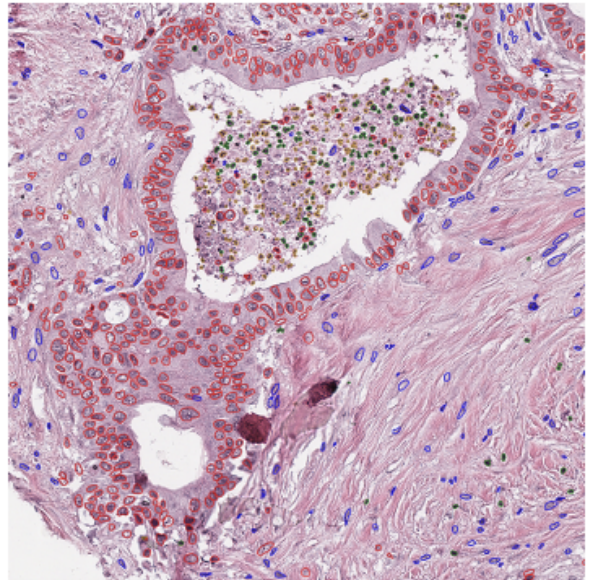

**Supplementary Figure 3: Example of nuclear segmentation in the UPMC Cohort. Related to Figure 2.** A) A digitally scanned image of a patient sample from the UPMC cohort without nuclear segmentation. This patient did not receive neoadjuvant chemotherapy prior to resection. B) The digitally scanned image of the patient sample from the UPMC cohort displayed in panel A with nuclear segmentation: red labels are neoplastic cells, blue labels are connective tissue cells, green labels are inflammatory cells, orange labels are non-neoplastic cells, and yellow labels are necrotic cells. C) A digitally scanned image of a patient sample from the UPMC cohort without nuclear segmentation. This patient did receive neoadjuvant chemotherapy prior to resection. D) The digitally scanned image of the patient sample from the UPMC cohort displayed in panel C with nuclear segmentation: red labels are neoplastic cells, blue labels are connective tissue cells, green labels are inflammatory cells, orange labels are non-neoplastic cells, and yellow labels are necrotic cells.

Supplementary Figure 4

**A**

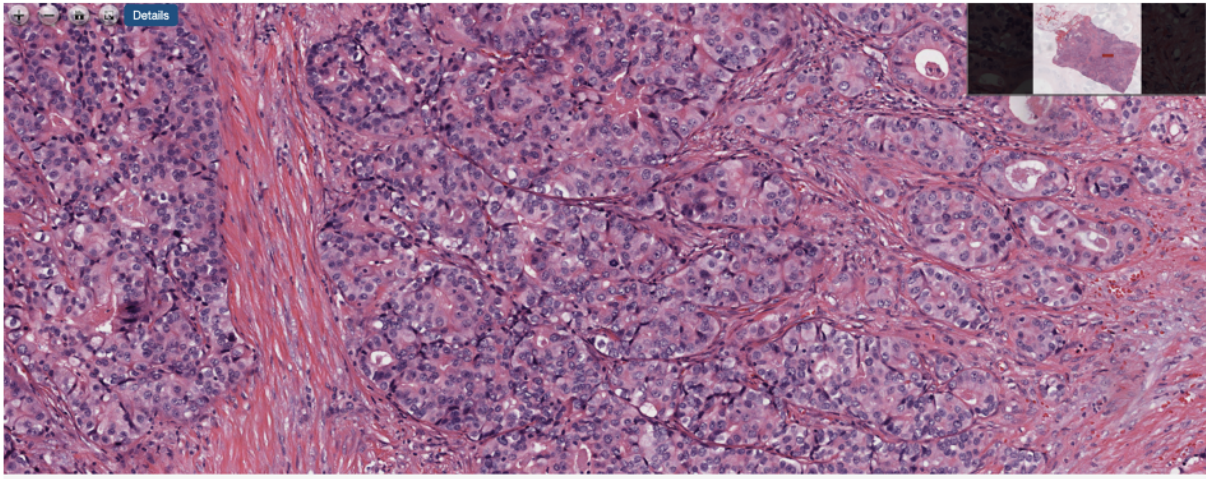

**B**

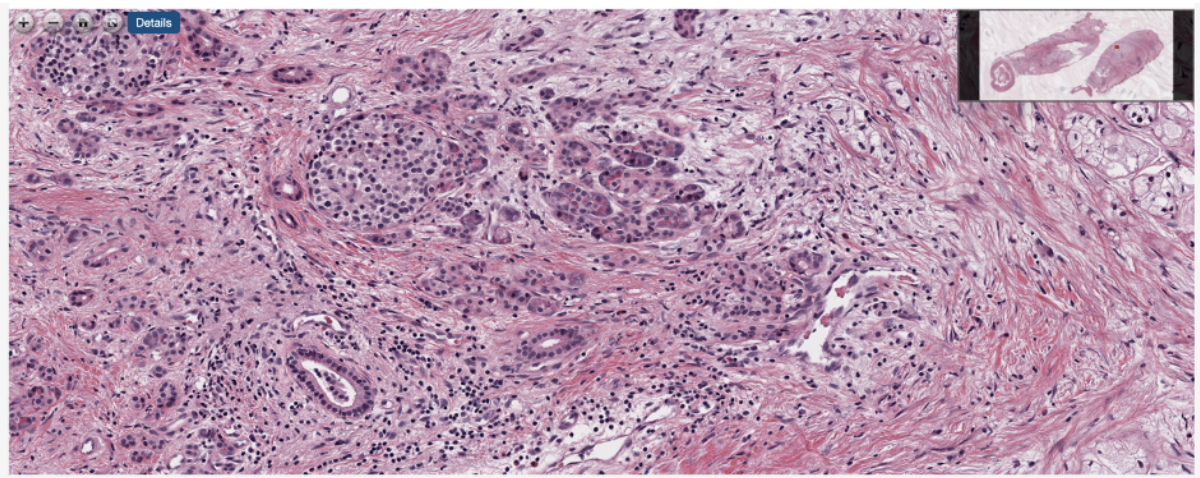

**Supplementary Figure 4: Examples of histologic images for VPG+ and VPG- slides. Related to Figure 2.** A) A digitally scanned image of a VPG+ slide from the TCGA cohort. The feature contributing to the VPG signature describes variation in nuclear morphology and demonstrates significant variation visually, as compared to: B) A digitally scanned image of a VPG- slide from the TCGA cohort. Both slides correspond to patients with tumor grade of G3.

Supplementary Figure 5

**DSS Stratified by the Histologic Signature  
among Test Set Patients with RNASeq Data**

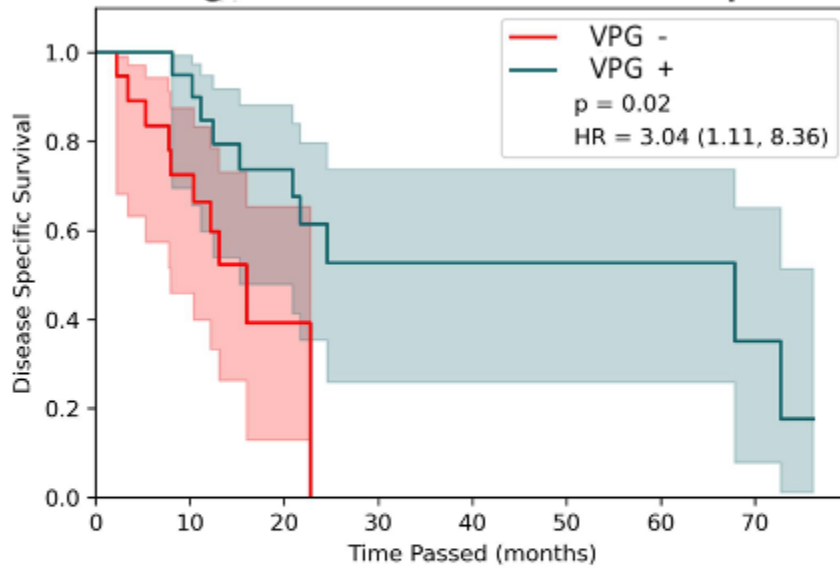

|          |    |    |    |    |    |    |    |    |
|----------|----|----|----|----|----|----|----|----|
| VPG -    |    |    |    |    |    |    |    |    |
| At risk  | 19 | 12 | 2  | 0  | 0  | 0  | 0  | 0  |
| Censored | 0  | 2  | 8  | 9  | 9  | 9  | 9  | 9  |
| Events   | 0  | 5  | 9  | 10 | 10 | 10 | 10 | 10 |
| VPG +    |    |    |    |    |    |    |    |    |
| At risk  | 20 | 19 | 12 | 6  | 5  | 4  | 3  | 2  |
| Censored | 0  | 0  | 3  | 6  | 7  | 8  | 9  | 9  |
| Events   | 0  | 1  | 5  | 8  | 8  | 8  | 8  | 9  |

**Supplementary Figure 5: The histologic signature stratifies patients by outcome following adjuvant gemcitabine among a sub-population of the TCGA test cohort with RNA Seq data available. Related to Figure 3.** Kaplan meier curve describing DSS among patients in a sub-population of the TCGA cohort test set with RNASeq data available (n=39, the same population of patients discussed in Figure 3A-C).

Supplementary Figure 6

**A** DSS Stratified by the Moffitt clusters in the entire TCGA cohort with RNASeq data available

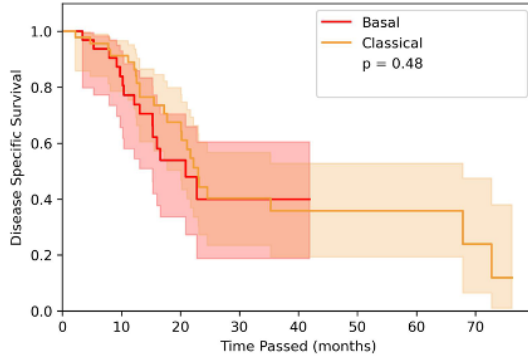

|           |    |    |    |    |    |    |    |
|-----------|----|----|----|----|----|----|----|
| Basal     |    |    |    |    |    |    |    |
| At risk   | 32 | 25 | 9  | 3  | 1  | 0  | 0  |
| Censored  | 0  | 2  | 10 | 14 | 16 | 17 | 17 |
| Events    | 0  | 5  | 13 | 15 | 15 | 15 | 15 |
| Classical |    |    |    |    |    |    |    |
| At risk   | 47 | 40 | 21 | 9  | 7  | 5  | 4  |
| Censored  | 0  | 3  | 13 | 17 | 18 | 20 | 21 |
| Events    | 0  | 4  | 13 | 21 | 22 | 22 | 23 |

**B** DSS Stratified by the Collisson clusters in the entire TCGA cohort with RNASeq data available

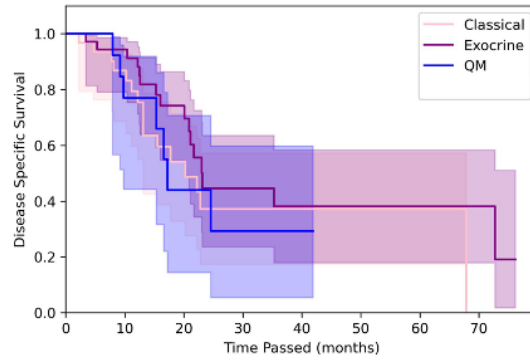

|           |    |    |    |    |    |    |    |
|-----------|----|----|----|----|----|----|----|
| Classical |    |    |    |    |    |    |    |
| At risk   | 31 | 24 | 10 | 3  | 2  | 2  | 2  |
| Censored  | 0  | 3  | 9  | 13 | 14 | 14 | 14 |
| Events    | 0  | 4  | 12 | 15 | 15 | 15 | 15 |
| Exocrine  |    |    |    |    |    |    |    |
| At risk   | 35 | 31 | 16 | 7  | 5  | 3  | 2  |
| Censored  | 0  | 2  | 11 | 14 | 15 | 17 | 18 |
| Events    | 0  | 2  | 8  | 14 | 15 | 15 | 15 |
| QM        |    |    |    |    |    |    |    |
| At risk   | 13 | 10 | 4  | 2  | 1  | 0  | 0  |
| Censored  | 0  | 0  | 3  | 4  | 5  | 6  | 6  |
| Events    | 0  | 3  | 6  | 7  | 7  | 7  | 7  |

**C** DSS Stratified by the Bailey clusters in the entire TCGA cohort with RNASeq data available

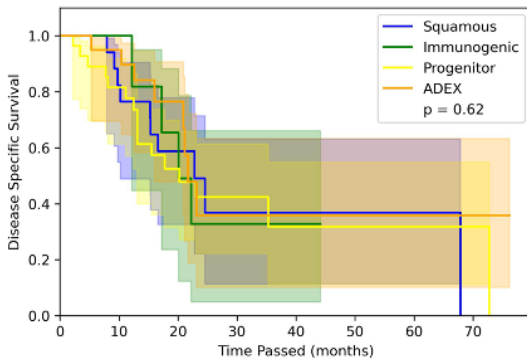

|             |    |    |    |    |    |    |    |
|-------------|----|----|----|----|----|----|----|
| Squamous    |    |    |    |    |    |    |    |
| At risk     | 17 | 14 | 7  | 3  | 2  | 1  | 1  |
| Censored    | 0  | 0  | 3  | 5  | 6  | 7  | 7  |
| Events      | 0  | 3  | 7  | 9  | 9  | 9  | 10 |
| Immunogenic |    |    |    |    |    |    |    |
| At risk     | 14 | 12 | 4  | 1  | 1  | 0  | 0  |
| Censored    | 0  | 2  | 7  | 8  | 8  | 9  | 9  |
| Events      | 0  | 0  | 3  | 5  | 5  | 5  | 5  |
| Progenitor  |    |    |    |    |    |    |    |
| At risk     | 28 | 21 | 11 | 5  | 3  | 2  | 2  |
| Censored    | 0  | 2  | 5  | 9  | 10 | 11 | 11 |
| Events      | 0  | 5  | 12 | 14 | 15 | 15 | 15 |
| ADEX        |    |    |    |    |    |    |    |
| At risk     | 20 | 18 | 8  | 3  | 2  | 2  | 1  |
| Censored    | 0  | 1  | 8  | 9  | 10 | 10 | 11 |
| Events      | 0  | 1  | 4  | 8  | 8  | 8  | 8  |

**Supplementary Figure 6: RNASeq clusters do not stratify patients by DSS following adjuvant gemcitabine across the entire gemcitabine-treated TCGA dataset. Related to Figure 3.** A-C) Kaplan meier curves describing DSS among all patients in the TCGA cohort with RNASeq data available (n=79) when stratified by A) Moffitt clusters, B) Collisson clusters, and C) Bailey clusters.



Supplementary Figure 7

**A** DSS stratified by Moffitt cohorts among all TCGA patients (including those without adjuvant gemcitabine treatment)

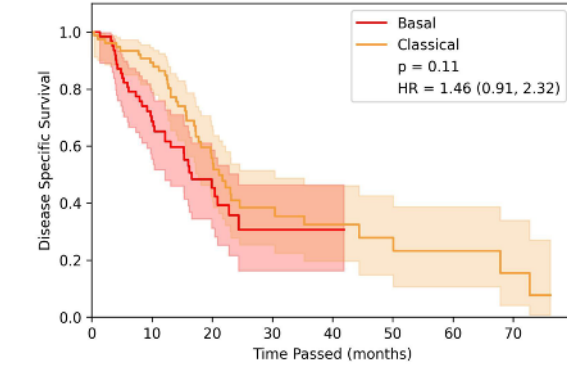

|           |    |    |    |    |    |    |    |    |
|-----------|----|----|----|----|----|----|----|----|
| Basal     |    |    |    |    |    |    |    |    |
| At risk   | 63 | 39 | 15 | 6  | 1  | 0  | 0  | 0  |
| Censored  | 0  | 5  | 18 | 23 | 28 | 29 | 29 | 29 |
| Events    | 0  | 19 | 30 | 34 | 34 | 34 | 34 | 34 |
| Classical |    |    |    |    |    |    |    |    |
| At risk   | 80 | 62 | 29 | 13 | 10 | 6  | 4  | 2  |
| Censored  | 1  | 11 | 24 | 32 | 33 | 36 | 37 | 38 |
| Events    | 0  | 8  | 28 | 36 | 38 | 39 | 40 | 41 |

**B** DSS stratified by Collisson cohorts among all TCGA patients (including those without adjuvant gemcitabine treatment)

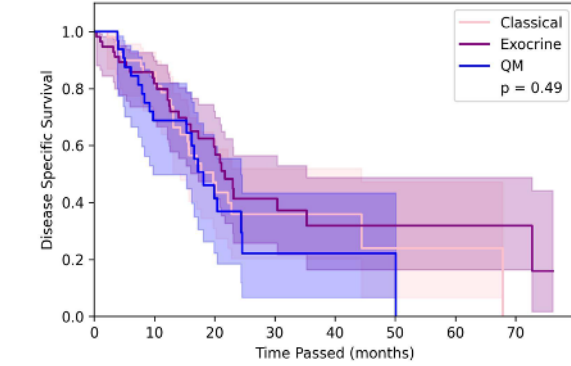

|           |    |    |    |    |    |    |    |    |
|-----------|----|----|----|----|----|----|----|----|
| Classical |    |    |    |    |    |    |    |    |
| At risk   | 52 | 37 | 14 | 6  | 4  | 2  | 2  | 0  |
| Censored  | 0  | 8  | 16 | 21 | 23 | 24 | 24 | 25 |
| Events    | 0  | 7  | 22 | 25 | 25 | 26 | 26 | 27 |
| Exocrine  |    |    |    |    |    |    |    |    |
| At risk   | 58 | 42 | 21 | 10 | 5  | 3  | 2  | 2  |
| Censored  | 1  | 7  | 18 | 23 | 26 | 28 | 29 | 29 |
| Events    | 0  | 10 | 20 | 26 | 28 | 28 | 28 | 28 |
| QM        |    |    |    |    |    |    |    |    |
| At risk   | 33 | 22 | 9  | 3  | 2  | 1  | 0  | 0  |
| Censored  | 0  | 1  | 8  | 11 | 12 | 13 | 13 | 13 |
| Events    | 0  | 10 | 16 | 19 | 19 | 19 | 20 | 20 |

**C** DSS stratified by Bailey cohorts among all TCGA patients (including those without adjuvant gemcitabine treatment)

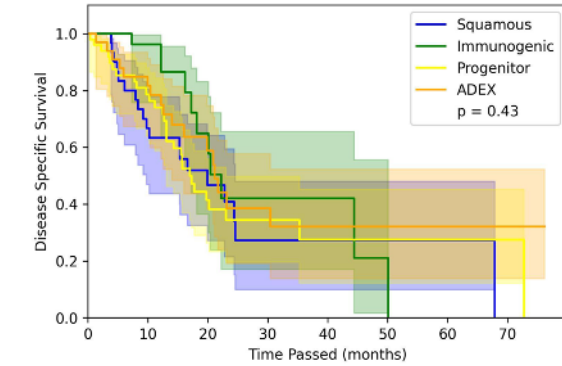

|             |    |    |    |    |    |    |    |    |
|-------------|----|----|----|----|----|----|----|----|
| Squamous    |    |    |    |    |    |    |    |    |
| At risk     | 30 | 20 | 9  | 4  | 2  | 1  | 1  | 0  |
| Censored    | 0  | 0  | 6  | 8  | 10 | 11 | 11 | 11 |
| Events      | 0  | 10 | 15 | 18 | 18 | 18 | 18 | 19 |
| Immunogenic |    |    |    |    |    |    |    |    |
| At risk     | 28 | 22 | 9  | 3  | 3  | 1  | 0  | 0  |
| Censored    | 0  | 5  | 13 | 16 | 16 | 17 | 17 | 17 |
| Events      | 0  | 1  | 6  | 9  | 9  | 10 | 11 | 11 |
| Progenitor  |    |    |    |    |    |    |    |    |
| At risk     | 50 | 34 | 14 | 6  | 4  | 2  | 2  | 1  |
| Censored    | 0  | 6  | 11 | 17 | 18 | 20 | 20 | 21 |
| Events      | 0  | 10 | 25 | 27 | 28 | 28 | 28 | 28 |
| ADEX        |    |    |    |    |    |    |    |    |
| At risk     | 35 | 25 | 12 | 6  | 2  | 2  | 1  | 1  |
| Censored    | 1  | 5  | 12 | 14 | 17 | 17 | 18 | 18 |
| Events      | 0  | 6  | 12 | 16 | 17 | 17 | 17 | 17 |

**Supplementary Figure 7: RNASeq clusters do not stratify patients by DSS across the entire TCGA dataset regardless of adjuvant treatment (n=143). Related to Figure 3.** A-C) Kaplan meier curves describing DSS among all patients in the TCGA cohort with RNASeq data available regardless of adjuvant treatment received (n=143) when stratified by A) Moffitt clusters, B) Collisson clusters, and C) Bailey clusters.

Supplementary Figure 8

**A**

**DSS among the adjuvant treated TCGA Cohort and untreated Copenhagen Cohort**

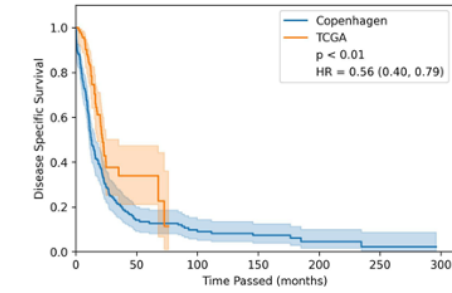

|            |     |     |     |     |     |     |     |
|------------|-----|-----|-----|-----|-----|-----|-----|
| Copenhagen |     |     |     |     |     |     |     |
| At risk    | 161 | 21  | 12  | 8   | 3   | 1   | 0   |
| Censored   | 0   | 2   | 4   | 6   | 9   | 10  | 11  |
| Events     | 0   | 138 | 145 | 147 | 149 | 150 | 150 |
| TCGA       |     |     |     |     |     |     |     |
| At risk    | 93  | 5   | 0   | 0   | 0   | 0   | 0   |
| Censored   | 0   | 44  | 47  | 47  | 47  | 47  | 47  |
| Events     | 0   | 44  | 46  | 46  | 46  | 46  | 46  |

**B**

**DSS among the adjuvant treated UPMC Cohort and untreated Copenhagen Cohort**

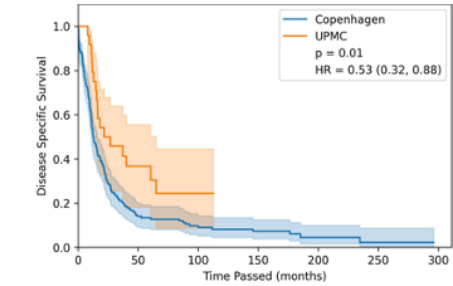

|            |     |     |     |     |     |     |     |
|------------|-----|-----|-----|-----|-----|-----|-----|
| Copenhagen |     |     |     |     |     |     |     |
| At risk    | 161 | 21  | 12  | 8   | 3   | 1   | 0   |
| Censored   | 0   | 2   | 4   | 6   | 9   | 10  | 11  |
| Events     | 0   | 138 | 145 | 147 | 149 | 150 | 150 |
| UPMC       |     |     |     |     |     |     |     |
| At risk    | 24  | 6   | 4   | 0   | 0   | 0   | 0   |
| Censored   | 0   | 3   | 3   | 7   | 7   | 7   | 7   |
| Events     | 0   | 15  | 17  | 17  | 17  | 17  | 17  |

**C**

**DSS among the adjuvant treated TCGA and UPMC Cohorts**

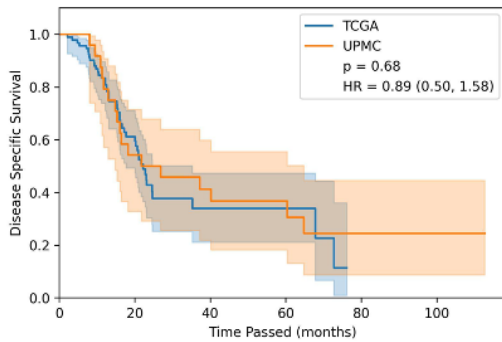

|          |    |    |    |    |    |    |
|----------|----|----|----|----|----|----|
| TCGA     |    |    |    |    |    |    |
| At risk  | 93 | 35 | 8  | 4  | 0  | 0  |
| Censored | 0  | 27 | 41 | 45 | 47 | 47 |
| Events   | 0  | 31 | 44 | 44 | 46 | 46 |
| UPMC     |    |    |    |    |    |    |
| At risk  | 24 | 13 | 9  | 6  | 4  | 4  |
| Censored | 0  | 0  | 1  | 3  | 3  | 3  |
| Events   | 0  | 11 | 14 | 15 | 17 | 17 |

**Supplementary Figure 8: Adjuvant gemcitabine-treated cohorts have different DSS from an untreated cohort. Related to Figure 4.** A) Kaplan meier curves describing DSS among all TCGA cohort patients (n=93) and all Copenhagen cohort patients (n=161). The p-value for the log-rank test is <0.01. B) Kaplan meier curves describing DSS among all UPMC cohort patients (n=24) and all Copenhagen cohort patients (n=161). The p-value for the log-rank test is 0.01. C) Kaplan meier curves describing DSS among all TCGA cohort patients (n=161) and all UPMC cohort patients (n=24). The p-value for the log-rank test is 0.68.

**Supplementary Figure 9**

**A**

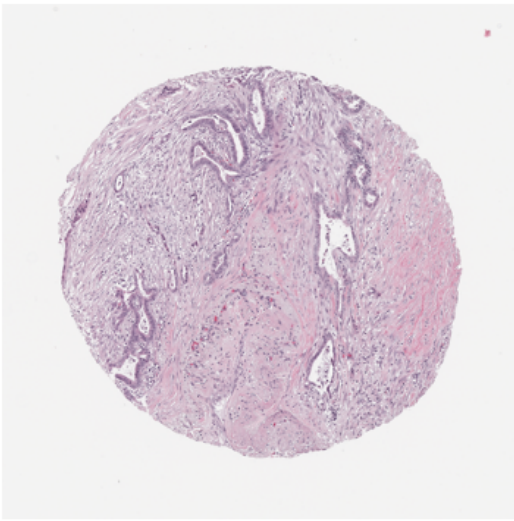

**B**

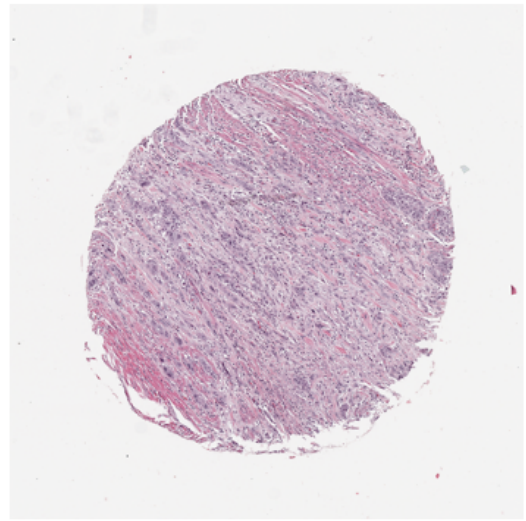

**C**

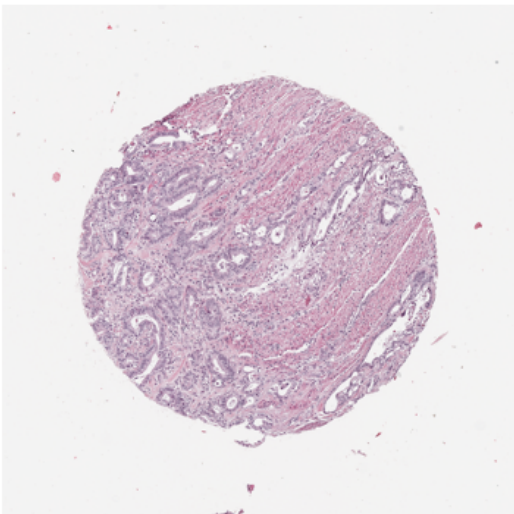

**Supplementary Figure 9: Examples of images of microarray specimens from the UPMC cohort (external validation set). Related to Figure 4. A, B, C) Three representative examples of scanned images of tissue microarray samples included in the external validation set (UPMC Cohort).**

**Supplementary Table 1**

|                                          | Training      | Test        |        |
|------------------------------------------|---------------|-------------|--------|
| n                                        | 46            | 47          |        |
| Age, Median (IQR)                        | 65 (56, 74.8) | 65 (60, 71) | p=0.65 |
| Gender (%)                               |               |             | p=0.26 |
| Female                                   | 23 (50)       | 17 (36)     |        |
| Male                                     | 23 (50)       | 30 (64)     |        |
| Tumor Grade (%)                          |               |             | p=0.09 |
| G1                                       | 2 (4)         | 10 (21)     |        |
| G2                                       | 30 (65)       | 22 (47)     |        |
| G3                                       | 13 (28)       | 14 (30)     |        |
| G4                                       | 1 (2)         | 1 (2)       |        |
| Adjuvant Regimen Received (%)            |               |             | p=0.98 |
| Gemcitabine alone                        | 43 (93)       | 45 (96)     |        |
| Gemcitabine in combination another agent | 3 (7)         | 2 (4)       |        |
| Length of Adjuvant Therapy (%)           |               |             | p=0.26 |
| <3 months                                | 19 (41)       | 27 (57)     |        |
| 3-6 months                               | 10 (22)       | 9 (19)      |        |
| > 6 months                               | 17 (37)       | 11 (23)     |        |

**Supplementary Table 1: Clinical characteristics of the training and test sets from the TCGA. Related to Figure 2.** Table describing clinical characteristics among patients in the TCGA training and test sets. Patients were randomly divided between the two groups. P-values correspond to chi-squared tests run with the exception of the variable age, for which a Wilcoxon Rank Sum Test was run.

**Supplementary Table 2**

|                                             | Signature + | Signature - |        |
|---------------------------------------------|-------------|-------------|--------|
| n                                           | 23          | 24          |        |
| Age, Median (IQR)                           | 67 (59, 71) | 65 (62, 71) | p=0.72 |
| Gender (%)                                  |             |             | p=0.62 |
| Female                                      | 7 (30)      | 10 (42)     |        |
| Male                                        | 14 (70)     | 16 (58)     |        |
| Tumor Grade (%)                             |             |             | p=0.60 |
| G1                                          | 4 (17)      | 6 (25)      |        |
| G2                                          | 12 (52)     | 10 (42)     |        |
| G3                                          | 6 (26)      | 8 (33)      |        |
| G4                                          | 1 (4)       | 0 (0)       |        |
| Adjuvant Regimen Received (%)               |             |             | p=1    |
| Gemcitabine alone                           | 22 (96)     | 23 (96)     |        |
| Gemcitabine in combination<br>another agent | 1 (4)       | 1 (4)       |        |
| Length of Adjuvant Therapy (%)              |             |             | p=0.40 |
| <3 months                                   | 11 (48)     | 16 (67)     |        |
| 3-6 months                                  | 7 (30)      | 4 (17)      |        |
| > 6 months                                  | 5 (21)      | 4 (17)      |        |

**Supplementary Table 2: Clinical characteristics of the internal test set from the TCGA. Related to Figure 2.** Table describing clinical characteristics among patients in the TCGA test set who were signature + vs. signature -. P-values correspond to chi-squared tests run with the exception of the variable age, for which a Wilcoxon Rank Sum Test was run.

**Supplementary Table 3**

|                               | Signature + | Signature - |        |
|-------------------------------|-------------|-------------|--------|
| n                             | 29          | 17          |        |
| Age, Median (IQR)             | 60 (55, 71) | 66 (54, 71) | p=0.59 |
| Gender (%)                    |             |             | p=0.47 |
| Female                        | 13 (45)     | 5 (29)      |        |
| Male                          | 16 (55)     | 12 (71)     |        |
| ECOG (%)                      |             |             | p=0.37 |
| 0                             | 6 (21)      | 1 (6)       |        |
| 1                             | 4 (14)      | 2 (12)      |        |
| Not available                 | 19 (66)     | 14 (82)     |        |
| Tumor Grade (%)               |             |             | p=0.05 |
| G1                            | 3 (10)      | 0 (0)       |        |
| G2                            | 23 (79)     | 10 (59)     |        |
| G2-3                          | 0 (0)       | 2 (12)      |        |
| G3                            | 3 (10)      | 5 (29)      |        |
| Neoadjuvant Therapy Received  |             |             | p=0.67 |
| None                          | 15 (52)     | 9 (53)      |        |
| 5-FU Backbone                 | 6 (21)      | 5 (29)      |        |
| Gemcitabine Backbone          | 8 (28)      | 3 (18)      |        |
| Adjuvant Regimen Received (%) |             |             | p=0.45 |
| Gemcitabine alone             | 21 (72)     | 11 (65)     |        |

|                                |                                               |         |         |        |
|--------------------------------|-----------------------------------------------|---------|---------|--------|
|                                | Gemcitabine in combination with another agent | 6 (21)  | 6 (35)  |        |
|                                | Gemcitabine in combination with radiation     | 2 (7)   | 0 (0)   |        |
| Length of Adjuvant Therapy (%) |                                               |         |         | p=0.96 |
|                                | <3 months                                     | 6 (21)  | 4 (24)  |        |
|                                | 3-6 months                                    | 19 (66) | 10 (59) |        |
|                                | > 6 months                                    | 3 (10)  | 2 (12)  |        |
|                                | Date not available                            | 1 (3)   | 1 (6)   |        |

**Supplementary Table 3: Clinical characteristics of the external test set from UPMC. Related to Figure 4.**

Table describing clinical characteristics among patients in the UPMC cohort who were signature + vs. signature -. P-values correspond to chi-squared tests run with the exception of the variable age, for which a Wilcoxon Rank Sum Test was run.



**Supplementary Table 4**

|                   | Signature + | Signature - |        |
|-------------------|-------------|-------------|--------|
| n                 | 74          | 87          |        |
| Age, Median (IQR) | 62 (53, 69) | 63 (57, 69) | p=0.54 |
| Gender (%)        |             |             | p=0.86 |
| Female            | 36 (49)     | 40 (46)     |        |
| Male              | 38 (51)     | 47 (54)     |        |
| Tumor Grade (%)   |             |             | p=0.09 |
| G0                | 0 (0)       | 1 (1)       |        |
| G1                | 27 (36)     | 19 (22)     |        |
| G2                | 15 (20)     | 24 (28)     |        |
| G3                | 32 (43)     | 39 (45)     |        |
| G4                | 0 (0)       | 4 (5)       |        |

**Supplementary Table 4: Clinical characteristics of the external test set from Copenhagen. Related to Figure 4.** Table describing clinical characteristics among patients in the Copenhagen cohort who were signature + vs. signature -. P-values correspond to chi-squared tests run with the exception of the variable age, for which a Wilcoxon Rank Sum Test was run.
